# Supplementary material for: Common Laboratory Parameters Are Useful for Screening for Alcohol Use Disorder: Designing a Predictive Model Using Machine Learning
Source: MDPI journal article supplement (doi:10.3390/jcm11072061), 2022-04-06
Supplement: s1 [file s1]

## SUPPLEMENTARY INFORMATION

### COMMON LABORATORY PARAMETERS ARE USEFUL FOR SCREENING FOR ALCOHOL USE DISORDER. DESIGNING A PREDICTIVE MODEL USING MACHINE LEARNING.

**Juana Pinar-Sanchez <sup>1</sup>, Pablo Bermejo López <sup>2,\*</sup>, Julián Solís García del Pozo <sup>3,\*</sup>, Jose Redondo-Ruiz <sup>4,\*</sup>, Laura Navarro Casado <sup>5</sup>, Fernando Andres-Pretel <sup>6</sup>, María Luisa Celorrio Bustillo <sup>7</sup>, Mercedes Esparcia Moreno <sup>8</sup>, Santiago García Ruiz <sup>9</sup>, Jose Javier Solera Santos <sup>10</sup> and Beatriz Navarro Bravo <sup>11,\*</sup>.**

<sup>1</sup> Department of Internal Medicine. Jose Maria Morales Meseguer University General Hospital. 30008. Murcia. Spain.

<sup>2</sup> Associate Professor. Universidad de Castilla-La Mancha, Computer Science Department. 02071. Albacete. Spain.

<sup>3</sup> Department of Internal Medicine. Unit of Infectious Diseases. University General Hospital of Albacete. 02006. Albacete. Spain.

<sup>4</sup> Department of dermatology, stomatology, radiology and physical medicine. Special care dentistry unit and gerodontology. Jose Maria Morales Meseguer University General Hospital. Faculty of Medicine. University of Murcia. 30008. Murcia. Spain

<sup>5</sup> Department of Biochemistry. University General Hospital of Albacete. 02006. Albacete. Spain.

<sup>6</sup> Clinical Research Support Unit. National Paraplegics Hospital of Toledo Foundation. 45004. Toledo. Spain.

<sup>7</sup> Department of Mental Health: Addictive Conducts Unit Care in Albacete. General Practitioner and Master in Drug Addiction and Alcoholism. 02005. Albacete. Spain.

<sup>8</sup> Department of Mental Health: Addictive Conducts Unit Care in Albacete. Psychologist. Master in Drug Addiction and Alcoholism. 02005. Albacete. Spain.

<sup>9</sup> General Practitioner, blood donation center from Albacete and Cuenca. Department of Hematology. University General Hospital of Albacete. 02006. Albacete. Spain.

<sup>10</sup> Department of Internal Medicine. University General Hospital of Albacete. 02006. Albacete. Spain.

<sup>11</sup> Department of Psychology. Professor in Faculty of Medicine. Universidad de Castilla-La Mancha. 02008. Albacete. Spain.

\* Corresponding authors:

beatriz.navarro@uclm.es (B.N.B.); Tel: + (34) 967 599 200, 96150 (conserjería) / ext. 2902 (decanato); julianeloysois@gmail.com (J.S.G.d.P.); Tel: 967 597 214 (Internal Medicine/Unit of Infectious Diseases). University General Hospital of Albacete).

**Supplementary information: Table S1.** Variables's definition used in the predictive model.

| Variables's name | Definition                                | Units             |
|------------------|-------------------------------------------|-------------------|
| ID               | Code number                               |                   |
| CASES            | Type of participant                       |                   |
| STUDY_LEVEL      | Study_level                               |                   |
| MARITAL_STATUS   | Marital_status                            |                   |
| SEX              | Sex                                       |                   |
| AGE              | Age                                       | years             |
| ALB              | Albumin                                   | g/dL              |
| AMI              | Amylase                                   | g/dL              |
| APTT             | Activated Partial Thromboplastin Time     | seconds           |
| UA               | Uric acid                                 | mg/dL             |
| BAS              | Basophils                                 | $\times 10^3$ mcL |
| BAS_PERCENT      | Basophils_Percent                         | %                 |
| DBIL             | Direct Bilirubin                          | mg/dL             |
| IBIL             | Indirect Bilirubin                        | mg/dL             |
| TBIL             | Total Bilirubin                           | mg/dL             |
| CA               | Calcium                                   | mg/dL             |
| MCHC             | Mean Corpuscular Hemoglobin Concentration | g/dL              |
| CK               | Creatine Kinase                           | ng/mL             |
| CL               | Chlorine                                  | mmol/L            |
| COAG_            | Coagulation                               | g/dL              |
| CHOL             | Cholesterol                               | mg/dL             |
| CREA             | Creatinine                                | mg/dL             |
| EOS              | Eosinophils                               | $\times 10^3$ mcL |
| EOS_PERCENT      | Eosinophils_Percent                       | %                 |
| RBC              | Red Blood Cells (RBC)                     | $\times 10^6$ mcL |
| ALP              | Alkaline Phosphatase                      | U/L               |
| FERRIT           | Ferritin                                  | ng/mL             |
| Fibri            | Fibrinogen C                              | mg/dL             |
| GGT              | Gamma Glutamyl Transferase                | U/L               |
| GLOB             | Globulins                                 | g/dL              |
| GLU              | Glucose                                   | mg/dL             |
| AST              | Aspartate aminotransferase                | U/L               |
| ALT              | Alanine aminotransferase                  | U/L               |
| HB               | Hemoglobin                                | g/dL              |
| MCH              | Mean Corpuscular Hemoglobin               | pg                |
| HCT              | Hematocrit                                | %                 |
| HDL              | High-Density Lipoprotein Cholesterol      | mg/dL             |

|               |                                     |                   |
|---------------|-------------------------------------|-------------------|
| RDW           | Red Blood Cells Dispersion Index    | %                 |
| PDW           | Platelet Dispersion Index           | %                 |
| INR_          | International Normalized Ratio      |                   |
| K             | Potassium                           | mmol/L            |
| LDH           | Lactate dehydrogenase               | U/L               |
| LDL           | Low-density lipoprotein cholesterol | mg/dL             |
| WBC           | White blood cells (WBC)             | $\times 10^3$ mcl |
| LYM           | Lymphocytes                         | $\times 10^3$ mcl |
| LYM_PERCENT   | Lymphocytes_Percent                 | %                 |
| LUC_PERCENT   | Large Unstained Cells_Percent       | %                 |
| LUC_          | Large Unstained Cells               | $\times 10^3$ mcl |
| MONOS         | Monocytes                           | $\times 10^3$ mcl |
| MONOS_PERCENT | Monocytes_Percent                   | %                 |
| MPO           | Myeloperoxidase index               |                   |
| NEUTR         | Neutrophils                         | $\times 10^3$ mcl |
| NEUTR_PERCENT | Neutrophils_Percent                 | %                 |
| P             | Phosphorus                          | mg/dL             |
| CRP           | C-Reactive Protein                  | mg/dL             |
| PLAT          | Platelets                           | $\times 10^3$ mcl |
| TP            | Total Proteins                      | g/dL              |
| TG            | Tryglicerides                       | mg/dL             |
| Tf            | Transferrin                         | mg/dL             |
| UREA          | Urea                                | mg/dL             |
| MCV           | Mean Corpuscular Volume             | fL                |
| MPV           | Mean Platelet Volume                | fL                |
| SODIUM        | Na (Sodium)                         | mmol/L            |
| WEEKLY_SDU    | Weekly_Standard Drink Units         | 1SDU=10g alcohol  |

**Supplementary information: Figure S1.** Excerpt from the notebook generated with the predictive analysis with Scikit-learn.

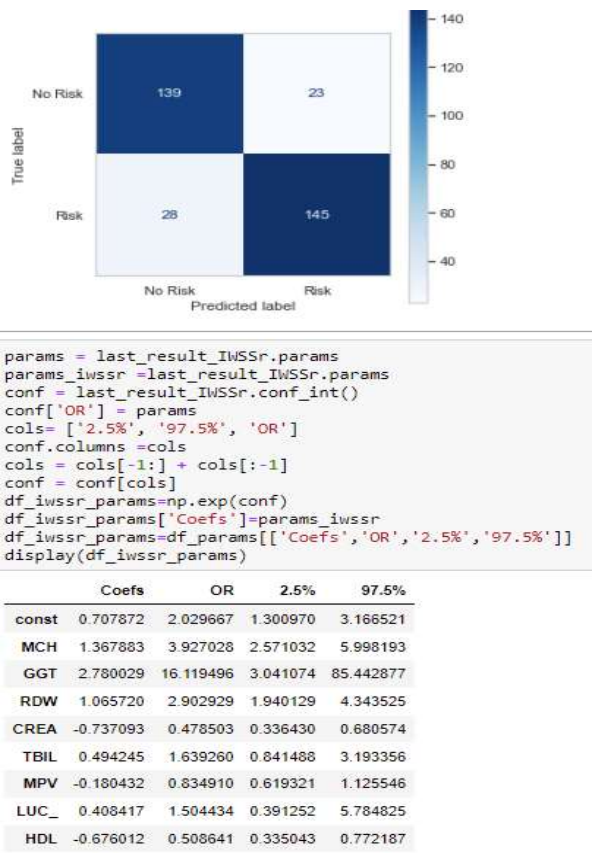

**Supplementary information: Figure S2.** Use of the Weka application for the creation of predictive models.

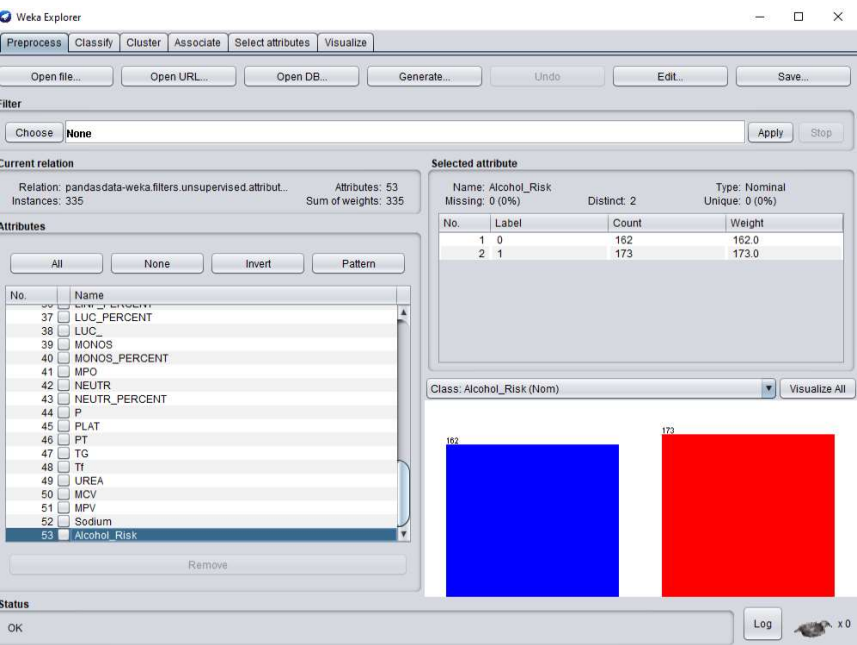

**Supplementary information: Table S2.** Correlation of different laboratory parameters with the binomial variable risk/no risk (alcohol consume).

**S. 2.1. Men and women.**

| <b>Risk drinker</b>                         |                           |                           |                |
|---------------------------------------------|---------------------------|---------------------------|----------------|
| <b>Variables</b>                            | <b>No (CI 95%)</b>        | <b>Yes (CI 95%)</b>       | <b>p-value</b> |
| Albumin                                     | 4.745 [4.699,4.791]       | 4.465 [4.363,4.568]       | 2.94E-05*      |
| Uric acid                                   | 5.336 [5.119,5.553]       | 5.400 [5.112,5.688]       | 9.77E-01       |
| Basophils                                   | 0.038 [0.034,0.042]       | 0.042 [0.039,0.046]       | 1.68E-04*      |
| % Basophils                                 | 0.454 [0.415,0.493]       | 0.525 [0.481,0.568]       | 1.26E-01       |
| Total Bilirubin                             | 0.449 [0.402,0.496]       | 0.660 [0.521,0.798]       | 7.21E-02       |
| Calcium                                     | 9.374 [9.317,9.431]       | 9.292 [9.173,9.411]       | 3.15E-01       |
| Medium corpuscular hemoglobin concentration | 33.170 [32.980,33.360]    | 33.363 [33.175,33.550]    | 1.56E-01       |
| Chlorine                                    | 100.747 [100.373,101.121] | 101.235 [100.552,101.918] | 8.72E-02       |
| Total Cholesterol                           | 192.468 [187.586,197.349] | 206.144 [197.494,214.794] | 1.70E-02*      |
| Creatinine                                  | 0.973 [0.941,1.005]       | 0.840 [0.811,0.868]       | 1.56E-09*      |
| Eosinophils                                 | 0.228 [0.209,0.247]       | 0.222 [0.195,0.249]       | 7.34E-02       |
| % Eosinophils                               | 2.804 [2.580,3.029]       | 2.736 [2.425,3.047]       | 1.11E-01       |
| Red blood cells                             | 4.851 [4.762,4.940]       | 4.697 [4.608,4.786]       | 4.29E-03*      |
| Alkaline Phosphatase                        | 55.873 [52.025,59.721]    | 82.144 [75.070,89.219]    | 2.79E-09*      |
| Ferritin                                    | 74.014 [60.099,87.928]    | 306.255 [232.433,380.077] | 3.82E-17*      |
| Gamma glutamyl transferase                  | 29.255 [22.662,35.847]    | 149.830 [96.124,203.535]  | 1.04E-20*      |
| Globulins                                   | 2.438 [2.387,2.490]       | 2.590 [2.476,2.704]       | 2.84E-02*      |
| Glucose                                     | 85.786 [81.231,90.342]    | 96.970 [91.355,102.585]   | 1.41E-06*      |
| Aspartate aminotransferase (AST)            | 21.194 [19.968,22.420]    | 46.444 [38.021,54.867]    | 1.17E-10*      |
| Alanine aminotransferase (ALT)              | 21.924 [20.225,23.623]    | 40.261 [34.639,45.883]    | 4.74E-09*      |

|                                              |                           |                           |           |
|----------------------------------------------|---------------------------|---------------------------|-----------|
| Total Hemoglobin                             | 14.448 [14.172,14.725]    | 15.068 [14.810,15.326]    | 1.17E-04* |
| Mean Corpuscular Hemoglobin                  | 29.840 [29.520,30.160]    | 32.207 [31.865,32.549]    | 2.66E-22* |
| Hematocrit                                   | 43.507 [42.746,44.269]    | 45.169 [44.419,45.919]    | 2.75E-04* |
| HDL (High Density Lipoprotein) - cholesterol | 57.208 [53.616,60.800]    | 60.234 [55.080,65.388]    | 7.76E-01  |
| Red Blood Cells distribution width           | 13.419 [13.216,13.621]    | 14.284 [14.031,14.536]    | 1.31E-08* |
| Platelet distribution width                  | 51.253 [50.186,52.321]    | 51.262 [50.009,52.516]    | 8.99E-01  |
| Potassium                                    | 4.323 [4.267,4.380]       | 4.481 [4.403,4.559]       | 1.43E-03* |
| Lactate dehydrogenase                        | 180.176 [174.705,185.646] | 217.388 [201.024,233.753] | 1.36E-02* |
| LDL (Light Density Lipoprotein)-Cholesterol  | 104.357 [97.827,110.887]  | 121.852 [114.450,129.253] | 1.32E-03* |
| White blood cells                            | 8.308 [7.994,8.623]       | 8.509 [8.017,9.000]       | 5.92E-01  |
| Lymphocytes                                  | 2.576 [2.474,2.679]       | 2.336 [2.203,2.468]       | 1.06E-03* |
| % Lymphocytes                                | 31.705 [30.594,32.816]    | 29.080 [27.639,30.521]    | 9.05E-03* |
| % Large Unstained Cells                      | 2.058 [1.953,2.163]       | 2.472 [1.788,3.155]       | 7.56E-01  |
| Large Unstained Cells                        | 0.167 [0.159,0.175]       | 0.200 [0.139,0.261]       | 3.40E-01  |
| Monocytes                                    | 0.513 [0.492,0.534]       | 0.513 [0.485,0.541]       | 6.23E-01  |
| Monocytes%                                   | 6.298 [6.074,6.522]       | 6.361 [6.063,6.658]       | 6.16E-01  |
| Myeloperoxidase                              | -1.264 [-2.089,-0.439]    | 0.234 [-0.622,1.089]      | 8.78E-03* |
| Sodium                                       | 142.474 [142.166,142.782] | 140.820 [140.235,141.404] | 1.89E-07* |
| Neutrophils                                  | 4.787 [4.526,5.049]       | 5.197 [4.738,5.655]       | 9.70E-01  |
| % Neutrophils                                | 56.672 [55.436,57.908]    | 58.821 [57.055,60.586]    | 5.83E-02  |
| Phosphor                                     | 3.501 [3.420,3.581]       | 3.225 [3.098,3.353]       | 1.48E-03* |
| Platelets                                    | 238.913 [228.327,249.499] | 244.576 [232.566,256.587] | 2.55E-01  |
| Total Protein                                | 7.184 [7.125,7.244]       | 7.049 [6.947,7.151]       | 1.17E-02* |

|                         |                           |                           |           |
|-------------------------|---------------------------|---------------------------|-----------|
| Tryglicerides           | 162.604 [146.138,179.070] | 136.063 [115.439,156.688] | 4.87E-03* |
| Transferrin             | 303.800 [296.494,311.106] | 266.511 [255.825,277.197] | 2.79E-08* |
| Urea                    | 36.196 [34.787,37.606]    | 26.719 [25.098,28.339]    | 2.35E-17* |
| Mean Corpuscular Volume | 89.979 [89.092,90.866]    | 96.551 [95.596,97.505]    | 1.31E-20* |
| Mean Platelet Volume    | 9.488 [9.315,9.660]       | 9.454 [9.266,9.643]       | 5.63E-01  |

### S. 2.2. Men.

| Risk drinker                                |                           |                           |           |
|---------------------------------------------|---------------------------|---------------------------|-----------|
| Variables                                   | No (CI 95%)               | Yes (CI 95%)              | p-value   |
| Albumin                                     | 4.759 [4.709,4.810]       | 4.523 [4.415,4.631]       | 8.87E-04* |
| Uric acid                                   | 5.770 [5.541,5.999]       | 5.659 [5.337,5.981]       | 3.00E-01  |
| Basophils                                   | 0.034 [0.031,0.038]       | 0.044 [0.040,0.048]       | 5.53E-06* |
| % Basophils                                 | 0.428 [0.385,0.471]       | 0.528 [0.478,0.577]       | 4.76E-02* |
| Total Bilirubin                             | 0.498 [0.441,0.554]       | 0.677 [0.510,0.843]       | 7.53E-01  |
| Calcium                                     | 9.384 [9.318,9.449]       | 9.306 [9.169,9.442]       | 3.46E-01  |
| Medium corpuscular hemoglobin concentration | 33.407 [33.192,33.622]    | 33.456 [33.258,33.654]    | 9.71E-01  |
| Chlorine                                    | 100.609 [100.136,101.082] | 101.208 [100.471,101.944] | 7.10E-02  |
| Total Cholesterol                           | 193.835 [187.769,199.901] | 206.912 [197.483,216.341] | 5.23E-02  |
| Creatinine                                  | 1.032 [0.998,1.067]       | 0.863 [0.833,0.892]       | 1.09E-12* |
| Eosinophils                                 | 0.236 [0.212,0.260]       | 0.223 [0.194,0.251]       | 8.32E-02  |
| % Eosinophils                               | 2.971 [2.705,3.238]       | 2.686 [2.375,2.996]       | 2.19E-02* |
| Red blood cells                             | 4.965 [4.853,5.076]       | 4.825 [4.730,4.919]       | 5.47E-03* |
| Alkaline Phosphatase                        | 61.457 [57.204,65.710]    | 81.659 [74.442,88.875]    | 3.96E-05* |
| Ferritin                                    | 81.495 [64.582,98.408]    | 323.063 [244.884,401.242] | 1.24E-17* |

|                                              |                           |                           |           |
|----------------------------------------------|---------------------------|---------------------------|-----------|
| Gamma glutamyl transpeptidase                | 31.027 [23.366,38.687]    | 152.879 [87.705,218.052]  | 7.88E-14* |
| Globulins                                    | 2.390 [2.332,2.448]       | 2.561 [2.437,2.685]       | 1.59E-02* |
| Glucose                                      | 88.816 [82.641,94.991]    | 96.652 [90.979,102.324]   | 1.05E-03* |
| Aspartate aminotransferase (AST)             | 22.257 [21.029,23.484]    | 45.299 [36.724,53.873]    | 1.20E-05* |
| Alanine aminotransferase (ALT)               | 24.286 [22.269,26.303]    | 40.826 [34.194,47.457]    | 6.16E-05* |
| Total Hemoglobin                             | 14.917 [14.594,15.241]    | 15.457 [15.207,15.707]    | 9.30E-04* |
| Mean Corpuscular Hemoglobin                  | 30.120 [29.787,30.453]    | 32.169 [31.837,32.500]    | 5.46E-16* |
| Hematocrit                                   | 44.616 [43.695,45.537]    | 46.237 [45.462,47.011]    | 4.70E-04* |
| HDL (High Density Lipoprotein) - Cholesterol | 53.250 [48.969,57.531]    | 58.200 [52.169,64.231]    | 8.13E-01  |
| Red Blood Cells distribution width           | 13.243 [13.024,13.461]    | 14.146 [13.898,14.394]    | 6.35E-09* |
| Platelet distribution width                  | 51.738 [50.436,53.041]    | 51.604 [50.138,53.070]    | 7.03E-01  |
| Potassium                                    | 4.328 [4.262,4.395]       | 4.487 [4.399,4.576]       | 5.26E-03* |
| Lactate dehydrogenase                        | 181.170 [174.699,187.641] | 214.773 [196.336,233.211] | 1.61E-01  |
| LDL (Light Density Lipoprotein)- Cholesterol | 104.979 [96.390,113.567]  | 123.575 [115.626,131.523] | 2.98E-03* |
| White blood cells                            | 8.021 [7.668,8.373]       | 8.559 [8.104,9.014]       | 1.93E-01  |
| Lymphocytes                                  | 2.503 [2.382,2.623]       | 2.349 [2.210,2.488]       | 7.11E-02  |
| % Lymphocytes                                | 31.723 [30.465,32.982]    | 28.628 [27.017,30.239]    | 4.96E-03* |
| % Large Unstained Cells                      | 2.122 [1.994,2.250]       | 2.131 [1.964,2.298]       | 6.41E-01  |
| Large Unstained Cells                        | 0.167 [0.156,0.177]       | 0.174 [0.161,0.187]       | 8.37E-01  |
| Monocytes                                    | 0.524 [0.498,0.550]       | 0.534 [0.503,0.565]       | 8.03E-01  |
| Monocytes%                                   | 6.627 [6.353,6.901]       | 6.460 [6.150,6.770]       | 3.61E-01  |
| Myeloperoxidase                              | -1.186 [-2.184,-0.188]    | -0.006 [-0.953,0.941]     | 6.54E-02  |



|                         |                           |                           |           |
|-------------------------|---------------------------|---------------------------|-----------|
| Sodium                  | 142.964 [142.616,143.311] | 141.085 [140.452,141.718] | 1.05E-08* |
| Neutrophils             | 4.559 [4.280,4.837]       | 5.236 [4.834,5.638]       | 5.74E-02  |
| % Neutrophils           | 56.121 [54.730,57.511]    | 59.563 [57.789,61.338]    | 7.46E-03* |
| Phosphor                | 3.522 [3.426,3.619]       | 3.225 [3.080,3.371]       | 3.36E-03* |
| Platelets               | 224.739 [213.499,235.980] | 240.493 [227.210,253.775] | 2.67E-02* |
| Total Protein           | 7.151 [7.080,7.222]       | 7.073 [6.955,7.192]       | 1.77E-01  |
| Tryglicerides           | 179.807 [159.881,199.734] | 141.892 [116.809,166.976] | 2.38E-04* |
| Transferrin             | 296.699 [288.220,305.178] | 258.806 [247.280,270.331] | 1.31E-07* |
| Urea                    | 38.000 [36.397,39.603]    | 27.425 [25.547,29.303]    | 4.83E-16* |
| Mean Corpuscular Volume | 90.193 [89.259,91.127]    | 96.190 [95.214,97.165]    | 2.14E-15* |
| Mean Platelet Volume    | 9.395 [9.194,9.595]       | 9.392 [9.185,9.599]       | 7.84E-01  |

### S. 2.3. Women.

| Risk drinker                                | No (CI 95%)               | Yes (CI 95%)             | p-value   |
|---------------------------------------------|---------------------------|--------------------------|-----------|
| Variables                                   |                           |                          |           |
| Albumin                                     | 4.693 [4.592,4.793]       | 4.213 [3.941,4.485]      | 6.70E-04* |
| Uric acid                                   | 4.144 [3.847,4.441]       | 4.364 [3.881,4.847]      | 4.01E-01  |
| Basophils                                   | 0.046 [0.037,0.054]       | 0.037 [0.031,0.043]      | 9.36E-01  |
| % Basophils                                 | 0.507 [0.427,0.587]       | 0.514 [0.422,0.605]      | 9.58E-01  |
| Total Bilirubin                             | 0.306 [0.245,0.367]       | 0.596 [0.370,0.822]      | 3.18E-03* |
| Calcium                                     | 9.333 [9.215,9.452]       | 9.235 [8.985,9.485]      | 4.87E-01  |
| Medium corpuscular hemoglobin concentration | 32.558 [32.205,32.911]    | 33.017 [32.522,33.512]   | 2.92E-02* |
| Chlorine                                    | 101.116 [100.526,101.706] | 101.346 [99.494,103.199] | 8.43E-01  |

|                                              |                           |                           |           |
|----------------------------------------------|---------------------------|---------------------------|-----------|
| Total Cholesterol                            | 189.977 [181.736,198.218] | 202.739 [179.612,225.866] | 3.16E-01  |
| Creatinine                                   | 0.810 [0.761,0.859]       | 0.752 [0.675,0.829]       | 1.45E-02* |
| Eosinophils                                  | 0.201 [0.170,0.232]       | 0.219 [0.149,0.289]       | 3.67E-01  |
| % Eosinophils                                | 2.291 [1.926,2.656]       | 2.922 [1.980,3.865]       | 4.94E-01  |
| Red blood cells                              | 4.541 [4.443,4.639]       | 4.222 [4.072,4.372]       | 6.68E-04* |
| Alkaline Phosphatase                         | 42.365 [35.622,49.108]    | 84.316 [60.987,107.644]   | 2.62E-04* |
| Ferritin                                     | 53.545 [29.299,77.792]    | 248.522 [49.379,447.665]  | 2.05E-02* |
| Gamma glutamyl transpeptidase                | 25.091 [11.520,38.661]    | 138.179 [60.733,215.625]  | 1.78E-07* |
| Globulins                                    | 2.553 [2.451,2.654]       | 2.723 [2.404,3.042]       | 6.27E-01  |
| Glucose                                      | 78.273 [75.078,81.468]    | 98.206 [81.105,115.307]   | 2.59E-04* |
| Aspartate aminotransferase (AST)             | 17.326 [16.079,18.574]    | 50.829 [25.762,75.895]    | 3.94E-07* |
| Alanine aminotransferase (ALT)               | 15.978 [13.399,18.556]    | 38.138 [27.743,48.533]    | 7.31E-06* |
| Total Hemoglobin                             | 13.200 [12.868,13.532]    | 13.622 [13.024,14.221]    | 8.89E-02  |
| Mean Corpuscular Hemoglobin                  | 29.133 [28.382,29.885]    | 32.350 [31.262,33.438]    | 1.01E-06* |
| Hematocrit                                   | 40.538 [39.613,41.463]    | 41.194 [39.688,42.701]    | 2.72E-01  |
| HDL (High Density Lipoprotein) - Cholesterol | 65.435 [59.556,71.313]    | 68.952 [60.542,77.362]    | 8.88E-01  |
| Red Blood Cells distribution width           | 13.873 [13.425,14.322]    | 14.794 [14.033,15.556]    | 6.59E-02  |
| Platelet distribution width                  | 50.027 [48.127,51.926]    | 49.992 [47.620,52.363]    | 9.70E-01  |
| Potassium                                    | 4.314 [4.200,4.428]       | 4.454 [4.279,4.628]       | 1.87E-01  |
| Lactate dehydrogenase                        | 174.341 [165.876,182.807] | 227.958 [190.073,265.844] | 4.59E-03* |
| LDL (Light Density Lipoprotein)-Cholesterol  | 103.955 [93.377,114.532]  | 114.714 [94.317,135.112]  | 4.81E-01  |
| White blood cells                            | 9.051 [8.401,9.700]       | 8.324 [6.670,9.977]       | 5.52E-03* |
| Lymphocytes                                  | 2.754 [2.557,2.951]       | 2.286 [1.916,2.655]       | 1.68E-03* |

|                         |                           |                           |           |
|-------------------------|---------------------------|---------------------------|-----------|
| % Lymphocytes           | 31.507 [29.101,33.912]    | 30.764 [27.452,34.076]    | 9.05E-01  |
| % Large Unstained Cells | 1.896 [1.712,2.079]       | 3.742 [0.485,6.998]       | 1.80E-01  |
| Large Unstained Cells   | 0.168 [0.152,0.184]       | 0.296 [0.005,0.587]       | 6.38E-02  |
| Monocytes               | 0.490 [0.455,0.524]       | 0.436 [0.379,0.493]       | 1.80E-01  |
| Monocytes%              | 5.493 [5.219,5.768]       | 5.992 [5.164,6.819]       | 2.25E-02* |
| Myeloperoxidase         | -1.387 [-2.926,0.153]     | 1.125 [-0.911,3.161]      | 4.44E-02* |
| Sodium                  | 141.209 [140.713,141.705] | 139.778 [138.300,141.255] | 1.60E-01  |
| Neutrophils             | 5.394 [4.805,5.982]       | 5.051 [3.423,6.679]       | 2.28E-03* |
| % Neutrophils           | 58.296 [55.660,60.931]    | 56.056 [50.850,61.261]    | 3.25E-01  |
| Phosphor                | 3.436 [3.284,3.588]       | 3.225 [2.931,3.519]       | 2.10E-01  |
| Platelets               | 272.778 [250.956,294.599] | 259.778 [231.230,288.326] | 4.11E-01  |
| Total Protein           | 7.245 [7.138,7.352]       | 6.940 [6.747,7.133]       | 7.08E-03* |
| Tryglicerides           | 122.386 [95.653,149.120]  | 111.292 [92.591,129.992]  | 9.49E-01  |
| Transferrin             | 320.610 [306.965,334.255] | 294.250 [269.805,318.695] | 1.14E-01  |
| Urea                    | 31.795 [29.249,34.342]    | 23.848 [20.867,26.830]    | 1.26E-04* |
| Mean Corpuscular Volume | 89.482 [87.329,91.636]    | 97.894 [95.151,100.638]   | 3.77E-06* |
| Mean Platelet Volume    | 9.740 [9.397,10.083]      | 9.686 [9.230,10.142]      | 7.00E-01  |

**Supplementary information: Figure S3.** Correlation of lab parameters with alcohol consumption (in Standard Drink Units (SDU)).

**S 3.1 Men and women**

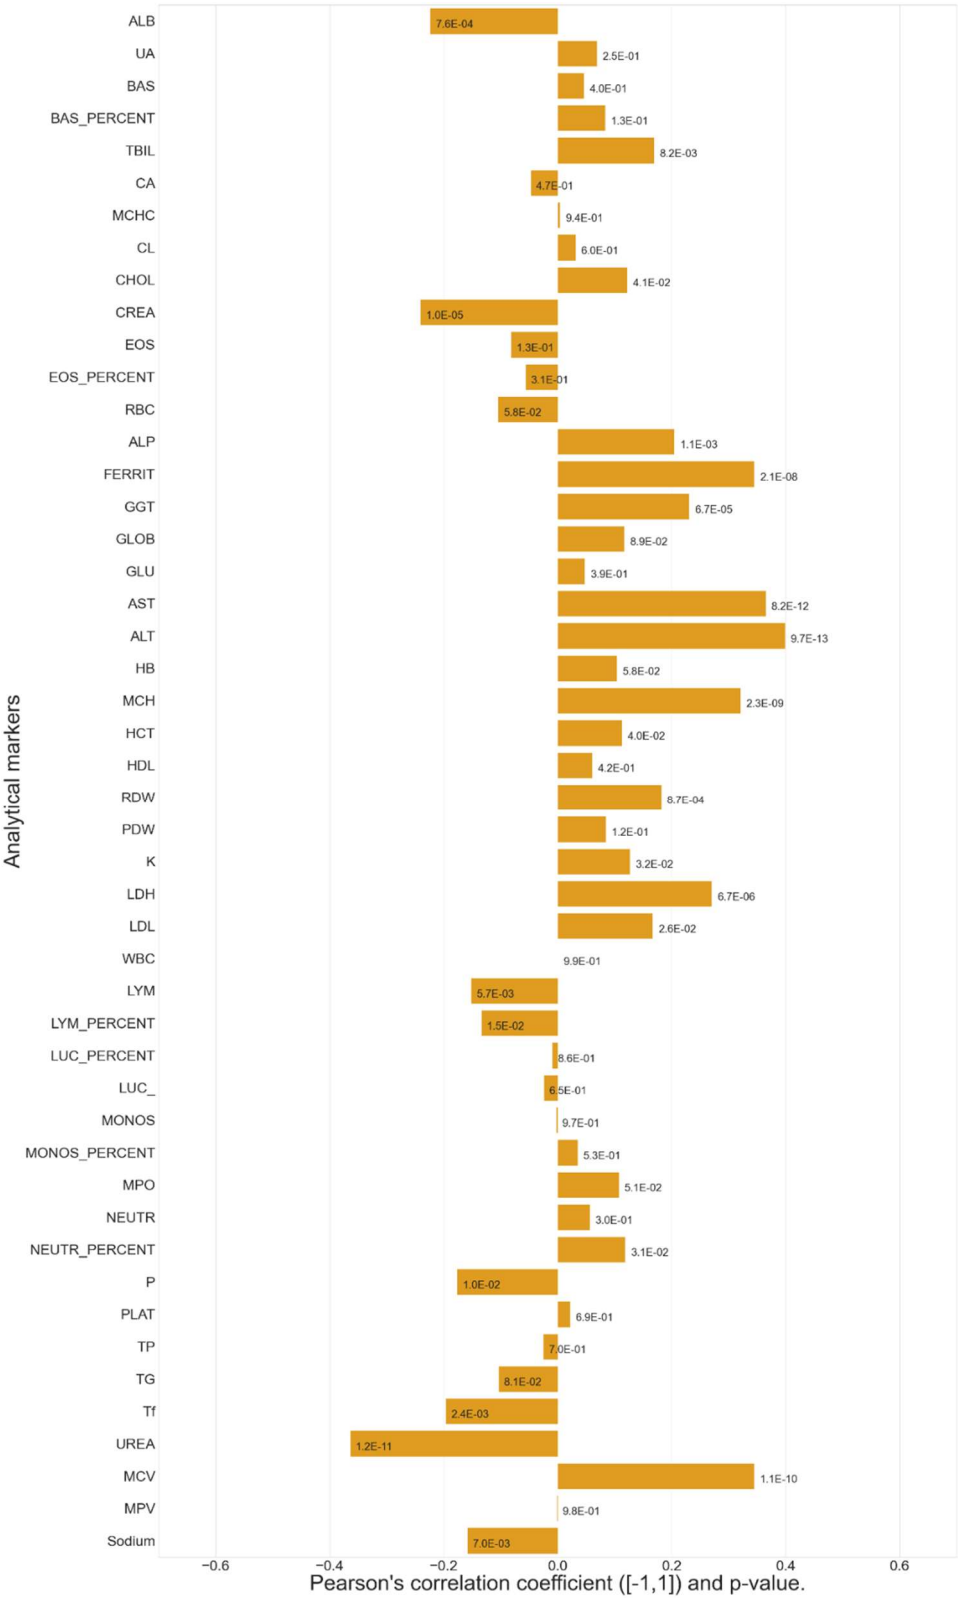

### S 3.2. Men

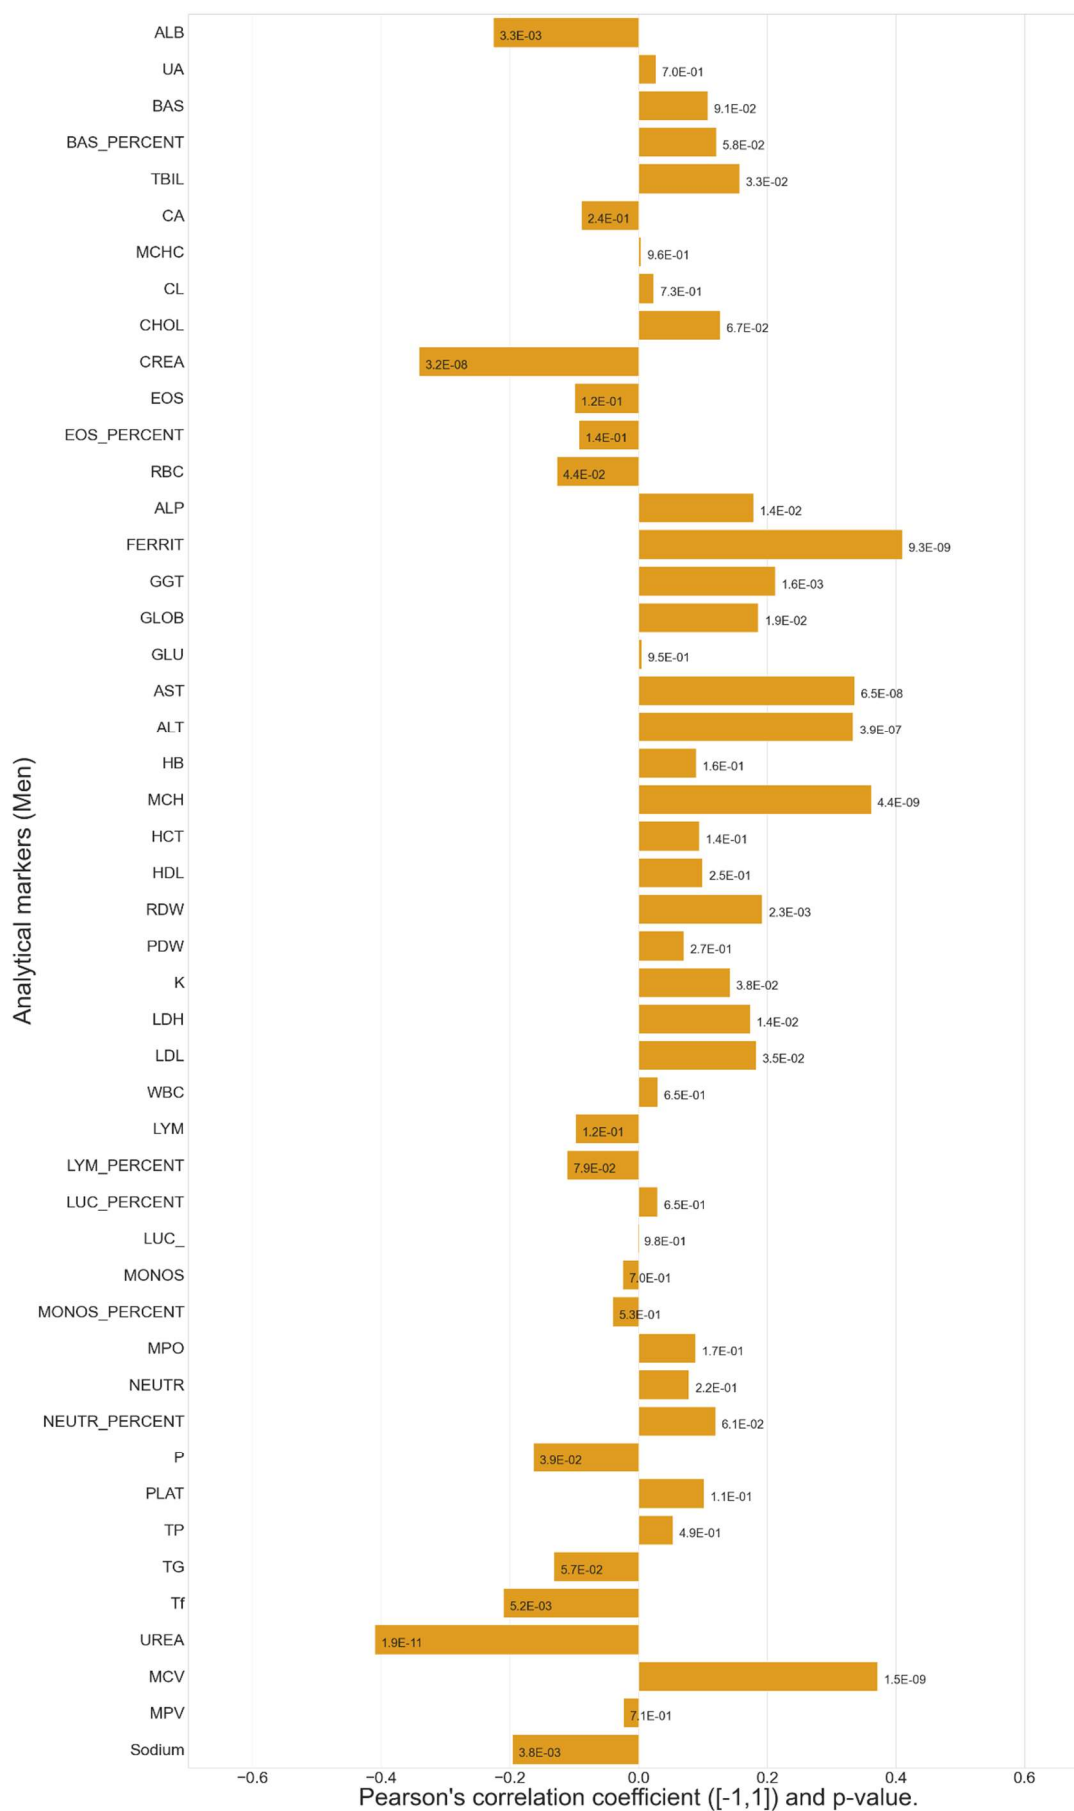

### S 3.3. Women.

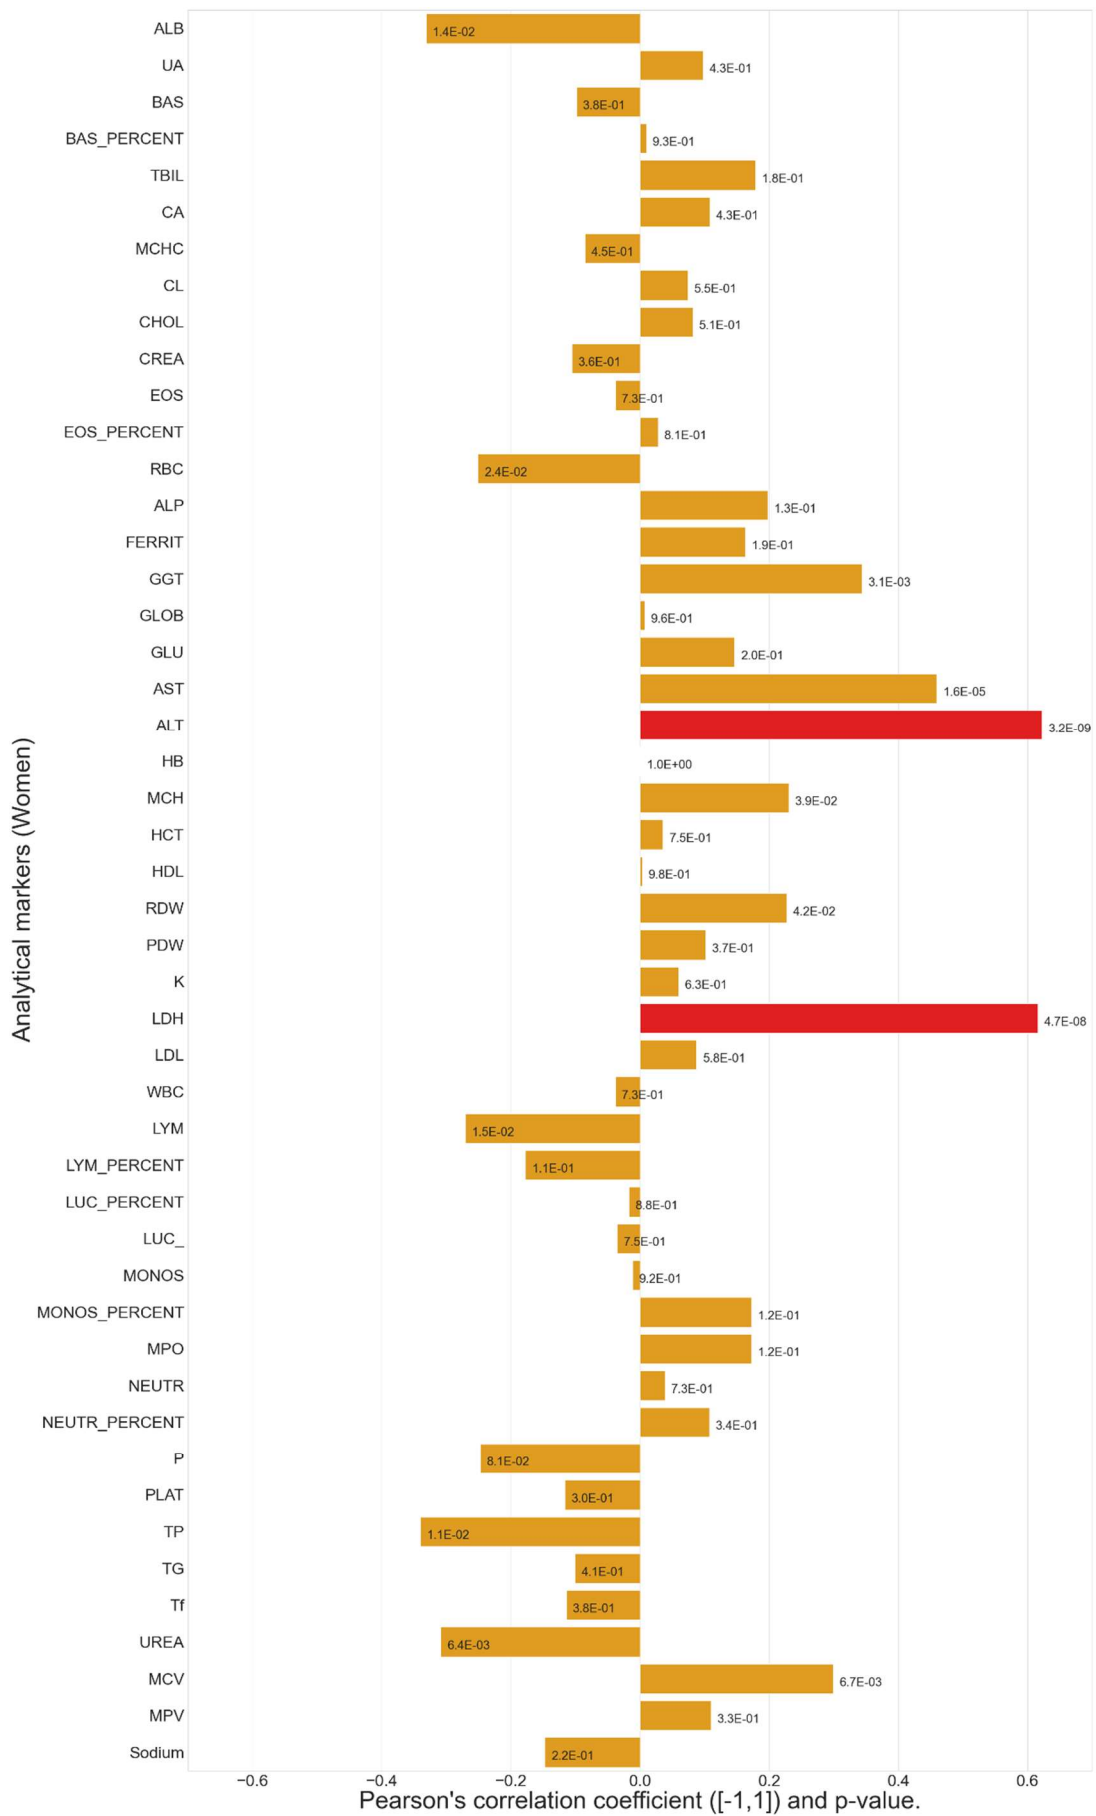

**Supplementary information: Figure S4.** Rate of participants with alcohol consumption risk.

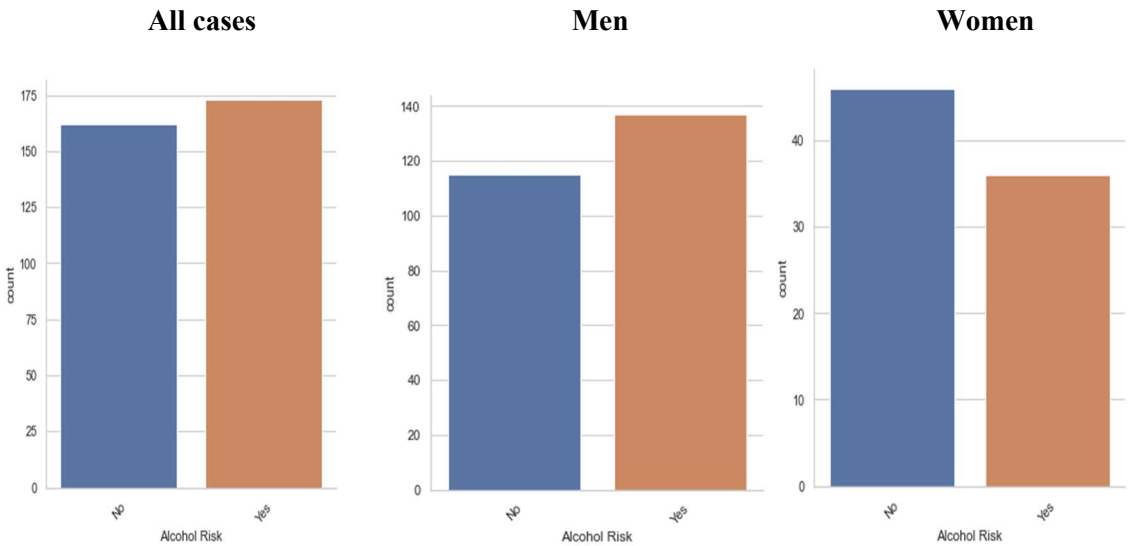

**Supplementary information. Example S1. Example of manual use of the logistic regression model to make a prediction.**

We take the case with ID = 1 and we will substitute the selected variables for the values presented by this patient, in the formula:

$$Prob (Riesgo) = 1 / (1 + \exp (-Z)) \text{ Prob (Risk)} = 1 / (1 + \exp (-Z)),$$

where  $Z$  is the sum of each variable multiplied by its corresponding coefficient. Since the training set was scaled, when predicting new cases, they must be scaled with the same scale learned (mean and deviation of each variable). So,

$$nuevo\_valorXi = (valorXi - mediaXi) / desviaciónXi$$

| Variables                                    | Patient value | Mean       | Standard Deviation | Escaled    |
|----------------------------------------------|---------------|------------|--------------------|------------|
| Mean Corpuscular Hemoglobin                  | 31.20         | 31.055.589 | 2.445.915          | 0.059042   |
| Gamma glutamyl transpeptidase                | 48.00         | 85.000.000 | 209.236.038        | -0.176834  |
| Red Blood Cells Dispersion Index             | 14.30         | 13.862.840 | 1.546.930          | 0.282598   |
| Creatinine                                   | 0.97          | 0.903517   | 0.203253           | 0.327096   |
| Total Bilirrubin                             | 0.30          | 0.547737   | 0.472864           | -0.523906  |
| Mean Platelet Volume                         | 9.20          | 9.470.393  | 1.169.194          | -0.231264  |
| Large Unstained Cells                        | 0.20          | 0.183927   | 0.287767           | 0.055853   |
| HDL (High Density Lipoprotein) - Cholesterol | 36.00         | 59.043.716 | 17.241.018         | -1.336.564 |

$$Z=0.6778+1.2997*0.059042-2.8804*0.176834+0.9826*0.282598+0.7294*0.327096-0.5458*0.523906-0.1743*0.231264+0.105*0.055853-0.7287*1.336564=1.01846$$

$$probability(risk)=1/(1+\exp(-1.01846))=0.73467$$

As probability (risk) > 0.5 (standard threshold), risk is predicted. Which has been a true positive (TP) because the patient with ID = 1 is at risk.

In the case of trying to predict for a patient with some missing variable, that variable and its coefficient will be ignored in the calculation of  $Z$  (the imputation of missing values replaces it with the mean; and the scaling subtracts the mean, which leaves to 0).



**Supplementary information. Example S2. Example of manual use for bayesian network for prediction.**

We take the case with ID = 1 and we will substitute the selected variables for the values presented by this patient, in the formula:

$$\text{Score (Risk)} = \prod P(X_i | \text{Risk})$$

$$\text{Score (No Risk)} = \prod P(X_i | \text{No Risk})$$

$$\forall X_i \in \text{Variables\_Selected}$$

And we return the prediction that maximizes the score result.

Taking as an example the patient with ID = 1, male with UBES\_TOTAL\_SEMANA = 36 (risk label):

| Variables                        | Patient value |
|----------------------------------|---------------|
| Study level                      | 2             |
| Basophils                        | 0.04          |
| Creatinine                       | 0.97          |
| Alkaline Phosphatase             | 101           |
| Gamma glutamyl transpeptidase    | 48            |
| Mean Corpuscular Hemoglobin      | 31.2          |
| Hematocrit                       | 50.5          |
| Red Blood Cells Dispersion Index | 14.3          |
| Dehydrogen lactate               | 204           |
| Urea                             | 35            |

Thus, in this example the score for risk (which is the group to which our patient belongs) would be as follows:

$$\text{Score (risk)} = 0.000090 = 0.202 * 0.911 * 0.871 * 0.226 * 0.428 * 0.25 * 0.382 * 0.859 * 0.836 * 0.519.$$

If our patient were labeled without risk, the score would be as follows:

$$\text{Score (no risk)} = 0.000010 = 0.033 * 0.649 * 0.598 * 0.058 * 0.071 * 0.8 * 0.150 * 0.531 * 0.985 * 0.566.$$

The tag with the highest score is predicted. Since the score received for risk is higher, that is the prediction returned, which is a true positive achieved by the classifier.
